# Supplementary material for: Fully integrated pressure-controlled electrochromic E-skins
Source: Royal Society of Chemistry journal article supplement (doi:10.1039/d1ta00380a), 2021-01-01
Supplement: d1ta00380a3.pdf [file d1ta00380a3.pdf]

## **Fully-integrated pressure-controlled electrochromic E-skins**

Ziyu Yue<sup>‡</sup>, Yi Wang<sup>‡</sup>, Yuan Lin and Chunyang Jia\*

<sup>‡</sup> These authors contributed equally to this work.

*State Key Laboratory of Electronic Thin Films and Integrated Devices, University of Electronic  
Science and Technology of China, Chengdu 610054, P. R. China*

*\*Corresponding author: [Chunyang Jia](#)*

*Tel.: +86 28 83201991;*

*Fax: +86 28 83202569;*

*Email: [cyjia@uestc.edu.cn](mailto:cyjia@uestc.edu.cn) (C. Y. Jia)*

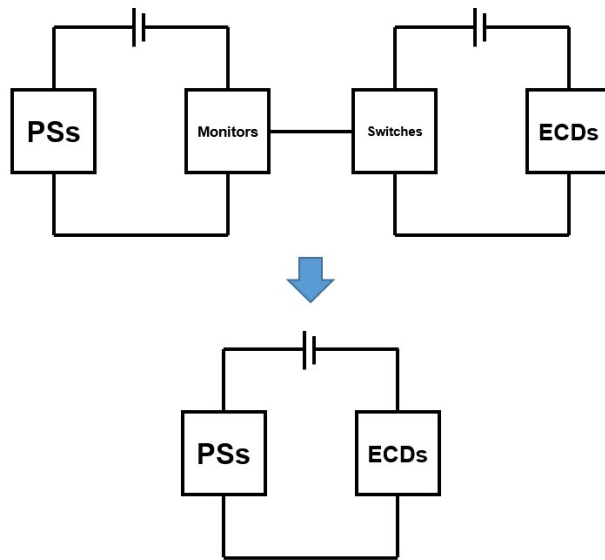

**Fig. S1** Schematic of generally tactile ECD controlling logic and PCECD controlling logic.

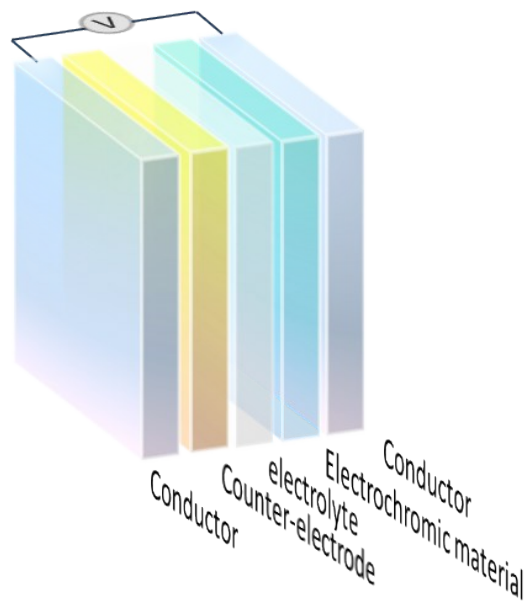

**Fig. S2** Schematic of the typical electrochromic device.

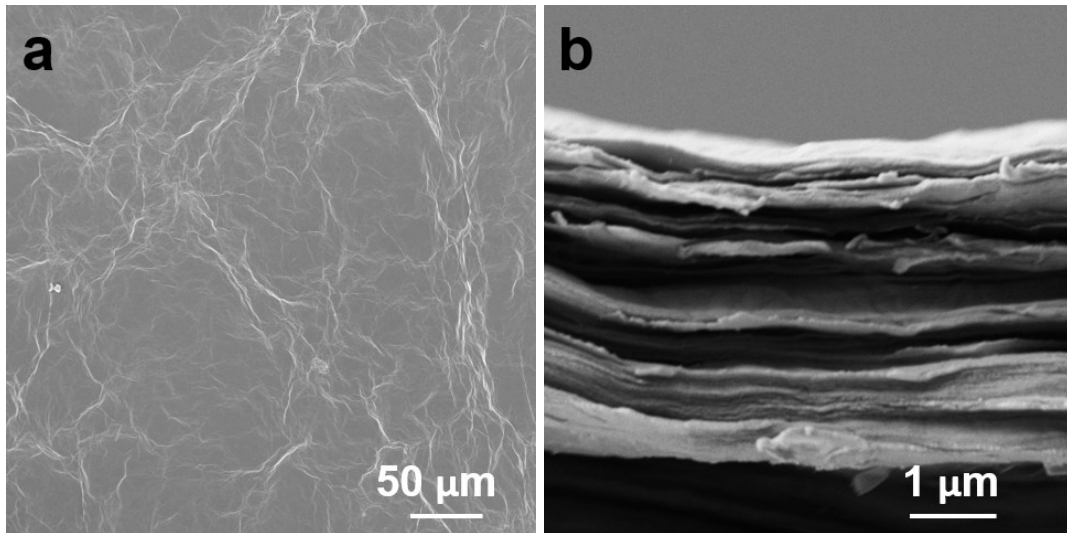

**Fig. S3** SEM image of surface (a) and cross-section (b) of GO film.

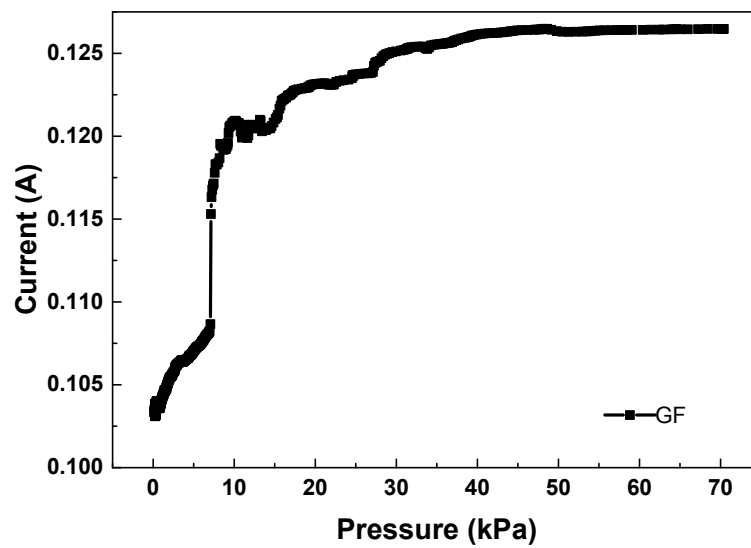

**Fig. S4** Current-pressure response of GF.

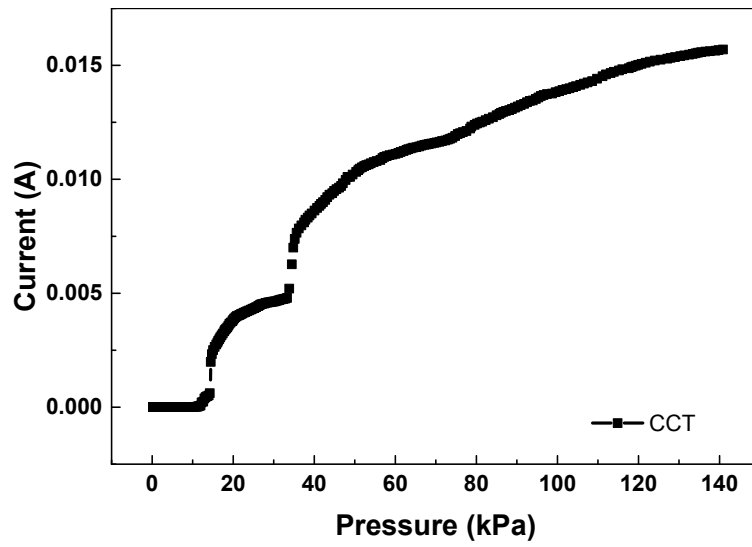

Fig. S5 Current-pressure response of CCT.

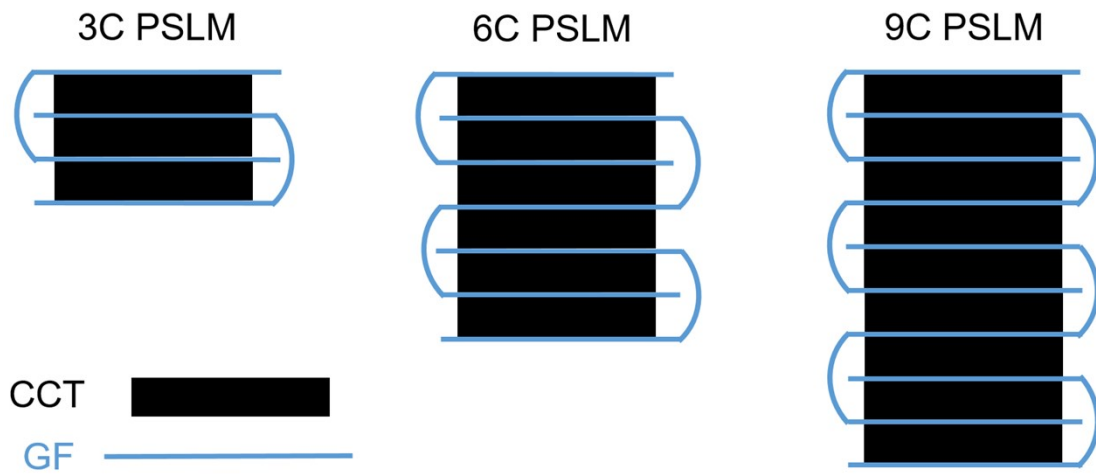

Fig. S6 Cross-section schematic of 3C, 6C and 9C PSLM

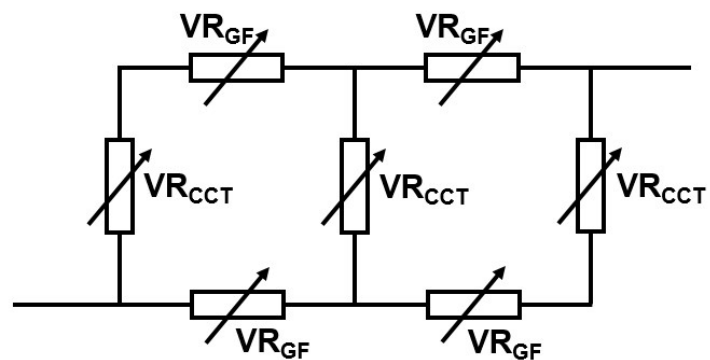

**Fig. S7** Equivalent circuit diagram of PSLM.

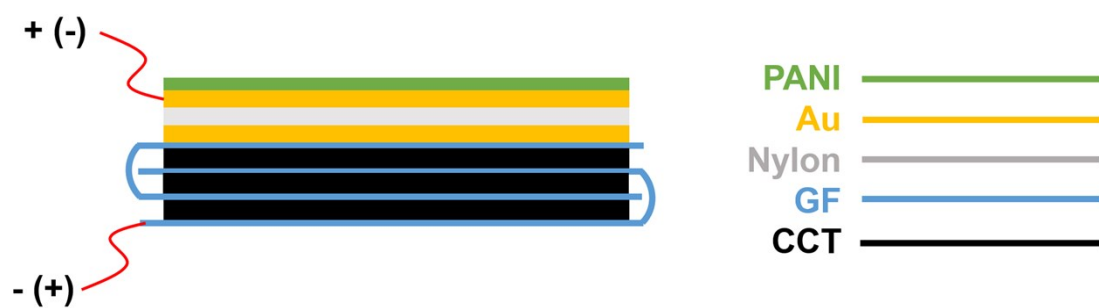

**Fig. S8** Cross-section schematic of the layered structure of PCECD.

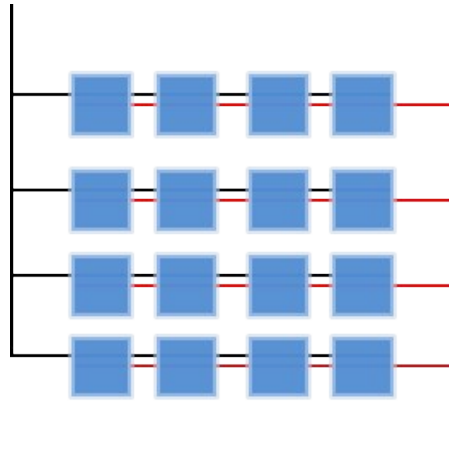

**Fig. S9** Schematic of the connection of multi-pixel PCECD array.

**Table S1** Four probes measurement results of GF,CCT and Au/Nylon

| Sample      | Thickness   | $R_{\square}$                 | $\sigma$ ( $S \cdot m^{-1}$ ) |
|-------------|-------------|-------------------------------|-------------------------------|
| GF          | 4.9 $\mu m$ | 15.39 $\Omega \cdot sq^{-1}$  | 13261                         |
| CCT         | 0.16 mm     | 253.6 $k\Omega \cdot sq^{-1}$ | 0.025                         |
| Au/Nylon 66 | ~ 300 nm    | 152.2 $m\Omega \cdot sq^{-1}$ | $2.19 \times 10^7$            |

**Table S2** The CIE  $L^*a^*b^*$ chromaticity corresponding parameters of the ECD.

| ECD      | $L^*$ | $a^*$ | $b^*$ |
|----------|-------|-------|-------|
| Original | 46.59 | 4.71  | 32.05 |
| Colored  | 27.7  | -1.06 | 4.37  |
| Bleached | 47.2  | 7.91  | 25.75 |
